# Supplementary material for: Toll-like receptor 4 is required for α-synuclein dependent activation of microglia and astroglia
Source: PubMed Central journal article supplement (PMC3568908; doi:10.1002/glia.22437), 2013-03

GFAP

TLR4

Merge

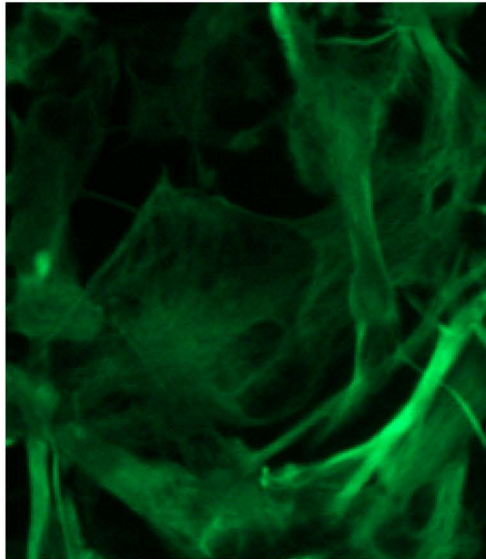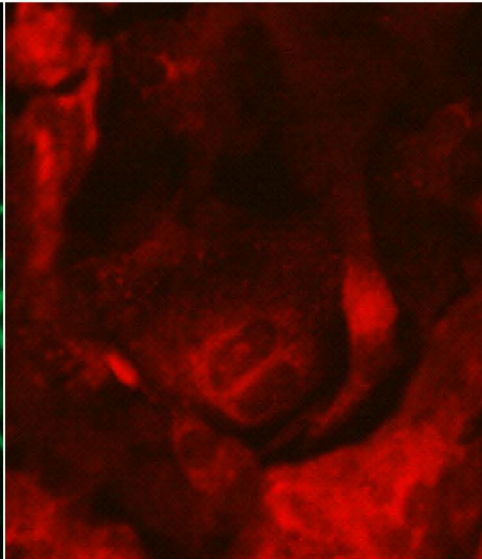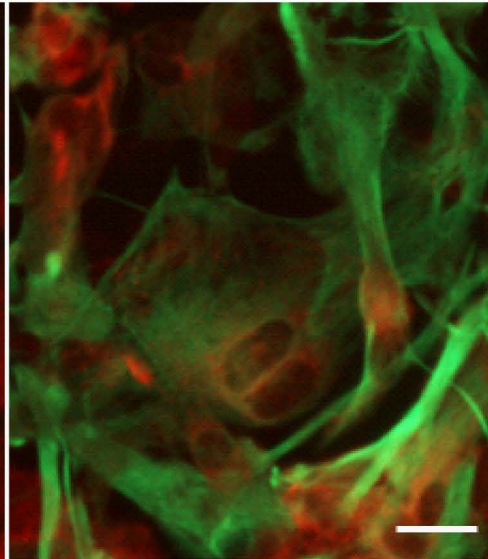

Supplement: glia0061-0349-sd1.pdf [file glia0061-0349-sd1.pdf]
